# Supplementary figures and images for: Nox4 mediates skeletal muscle metabolic responses to exercise
Source: PubMed Central journal article supplement — Mol Metab. 2021 Jan 2;45:101160. doi: 10.1016/j.molmet.2020.101160 (PMC7856463; doi:10.1016/j.molmet.2020.101160), 2021-01-02

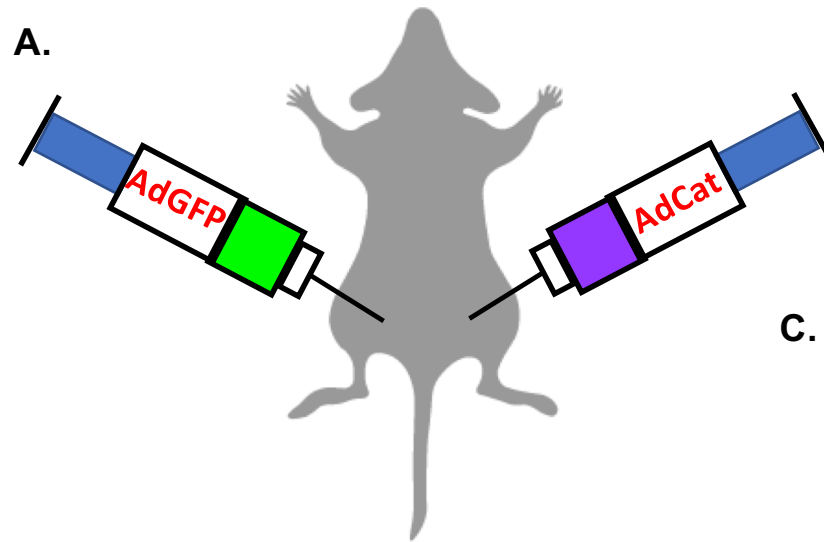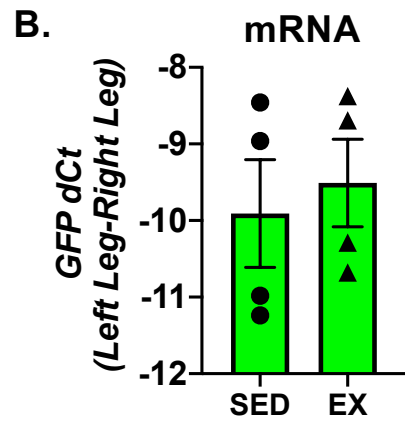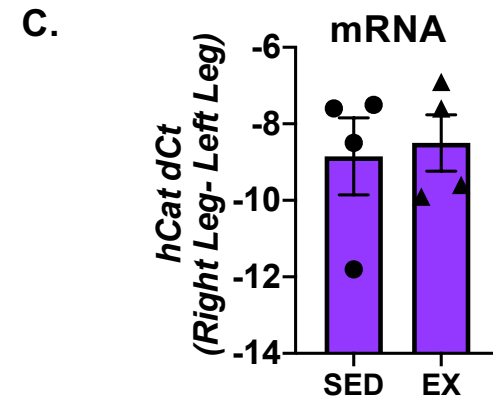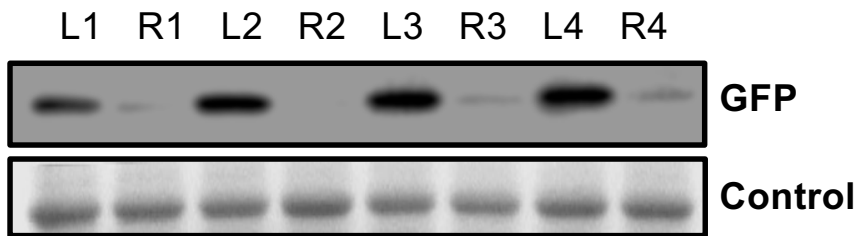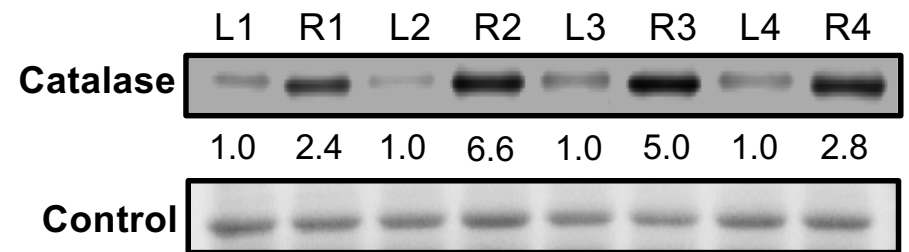

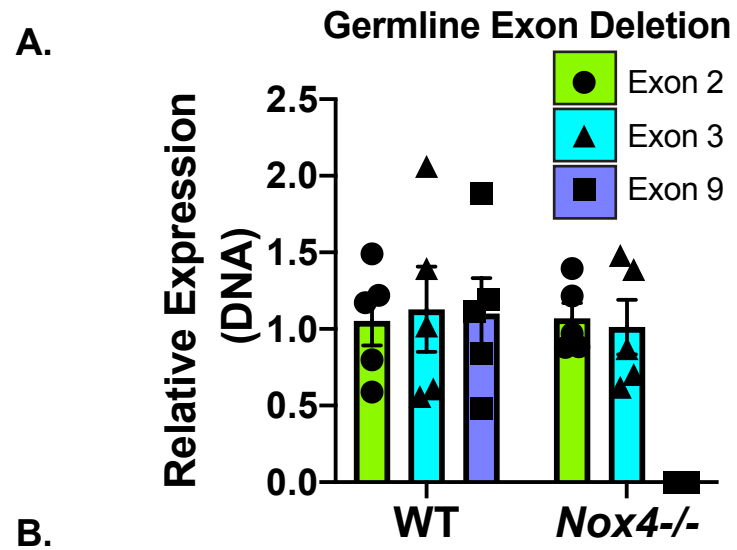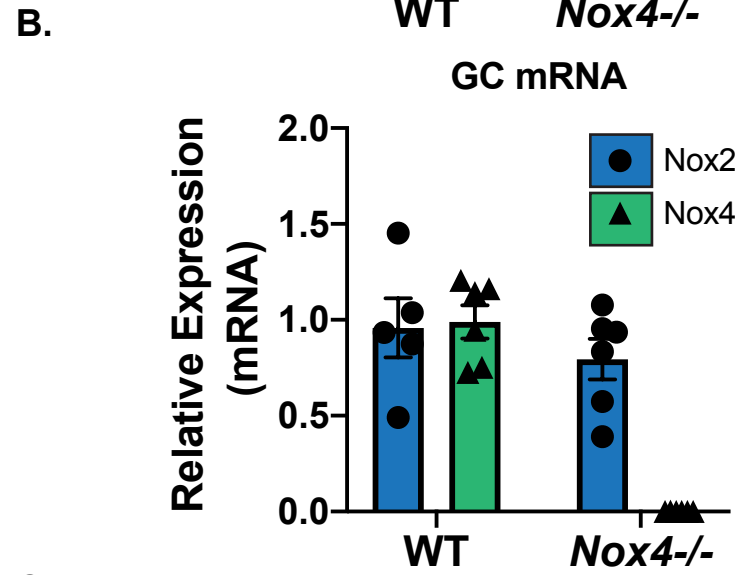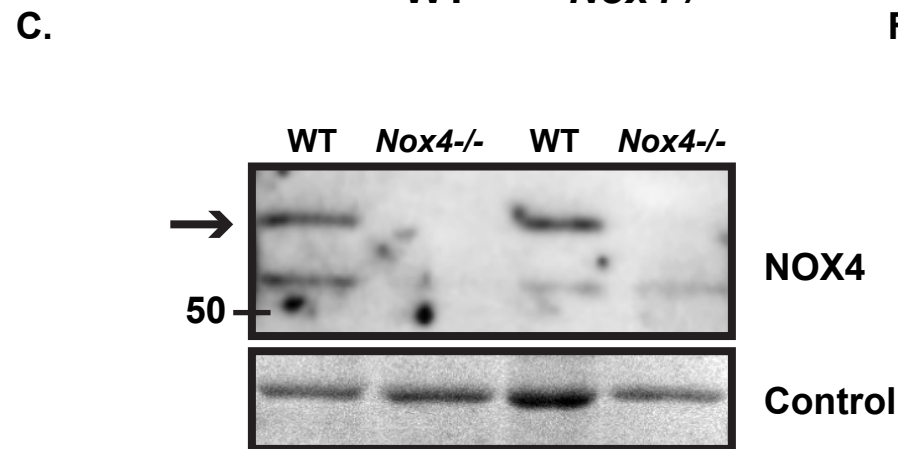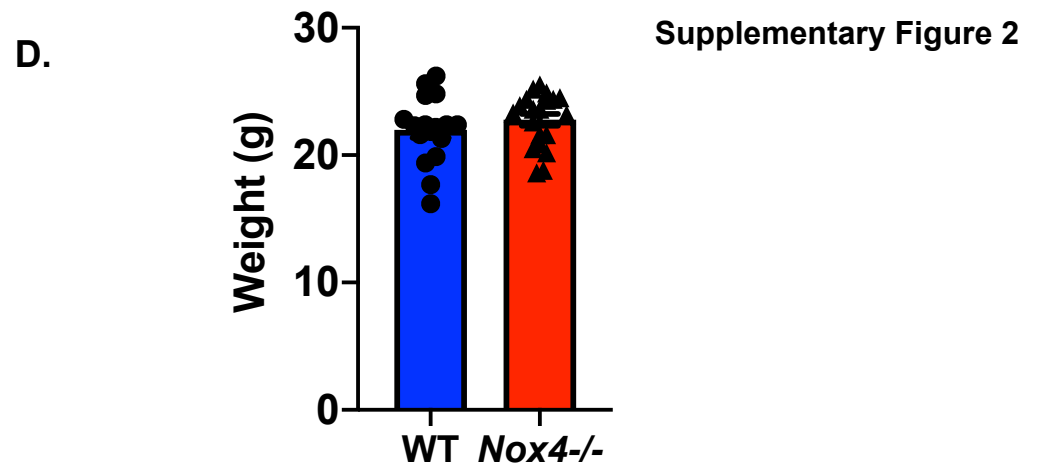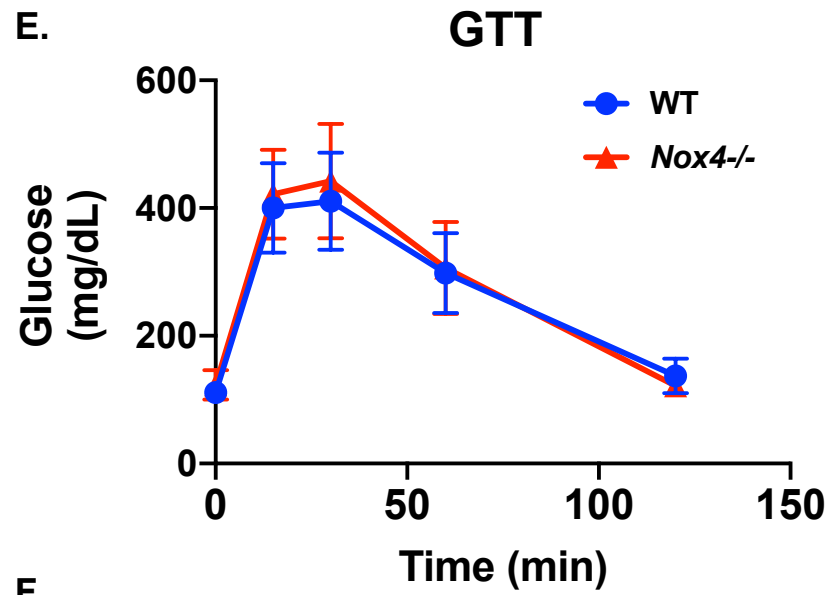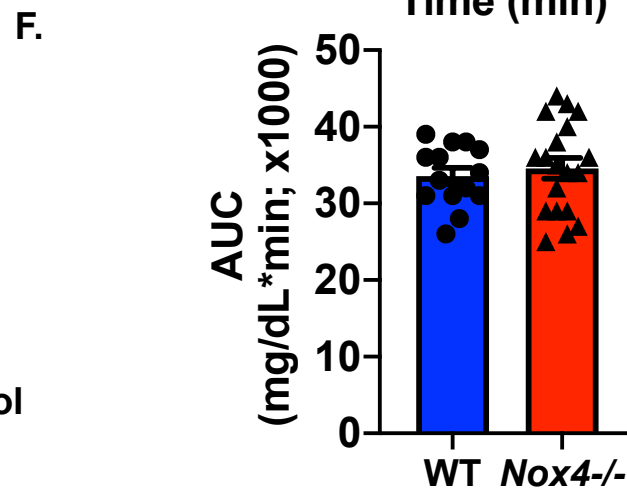

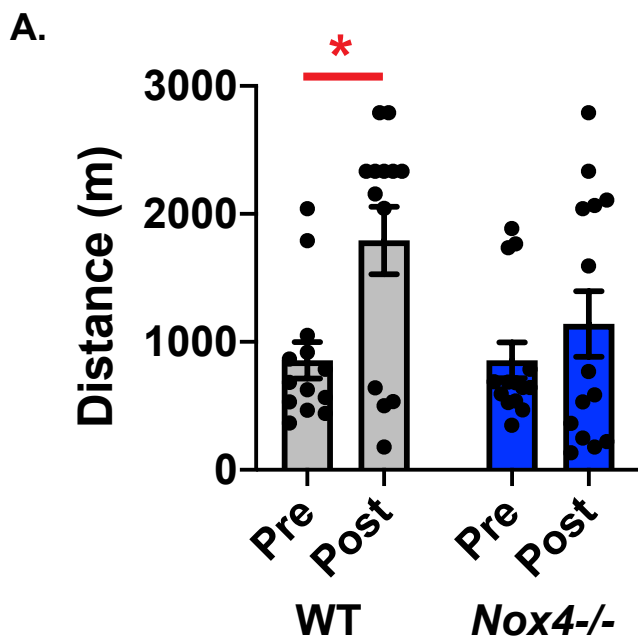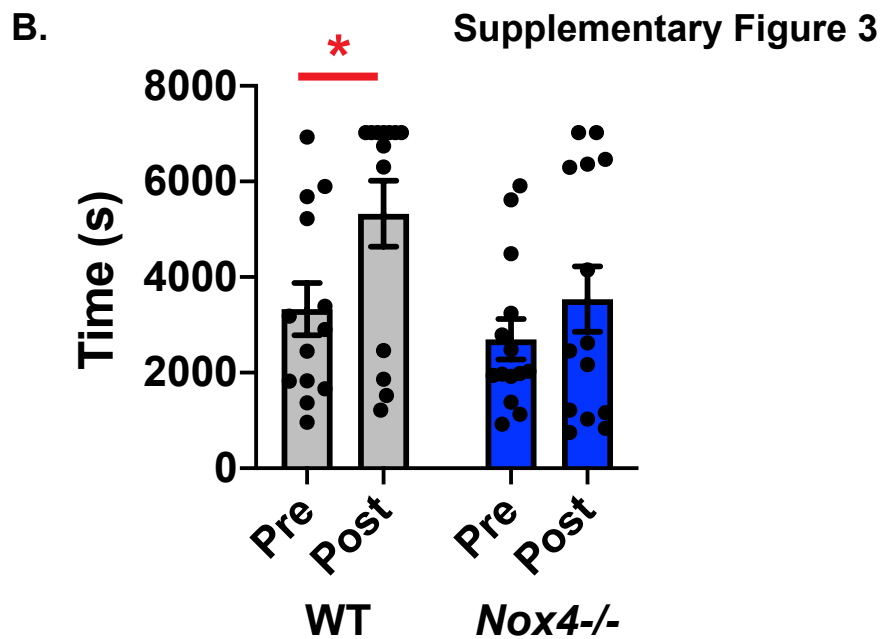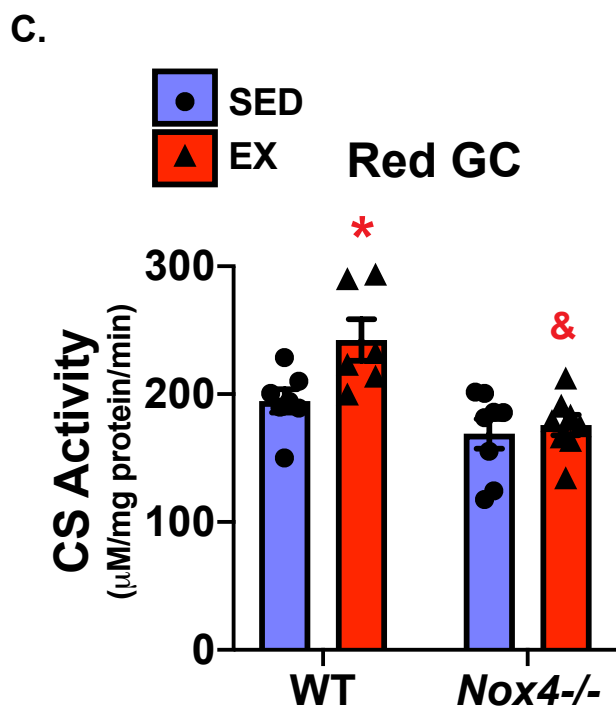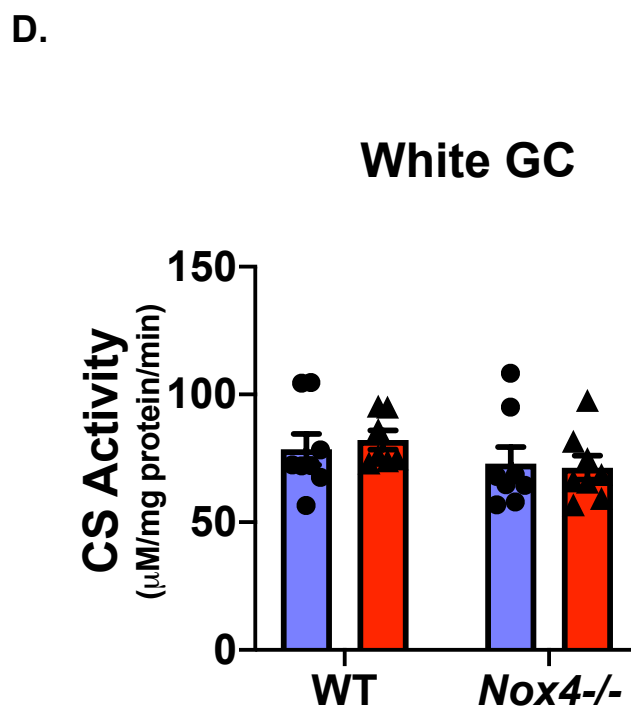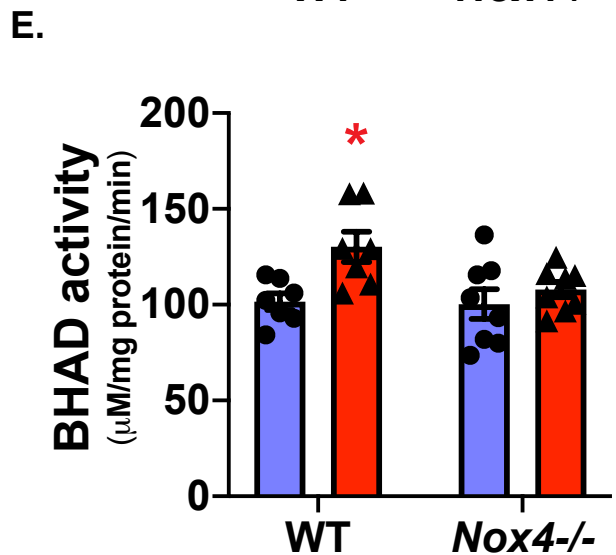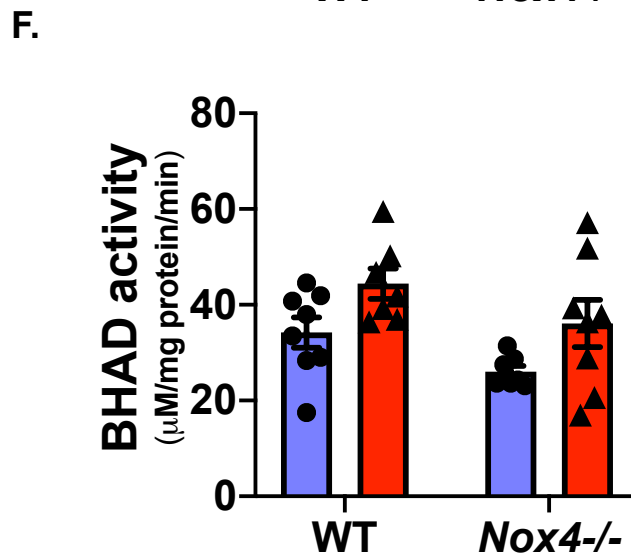

A.

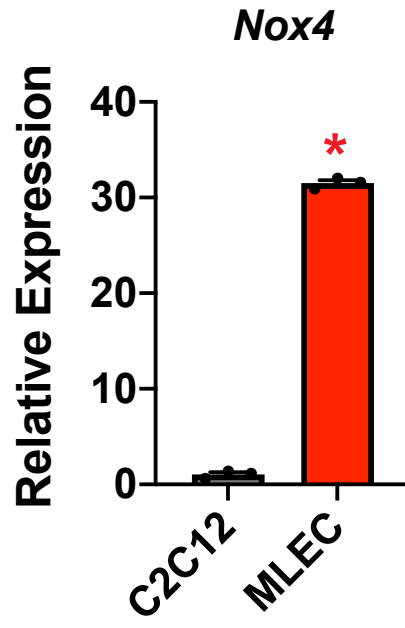

B.

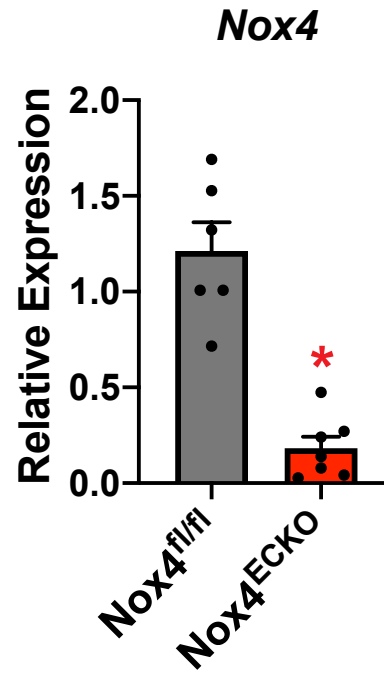

C.

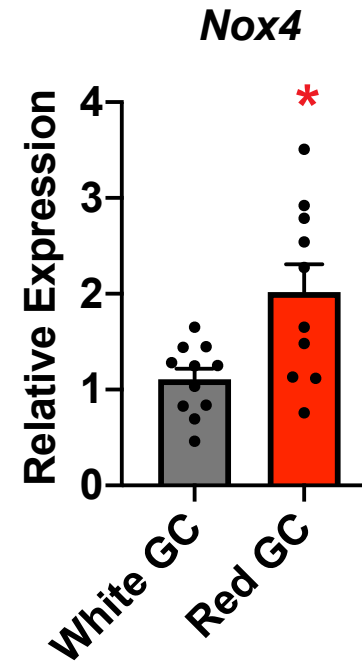

Supplement: mmc1.pdf [file mmc1.pdf]
